# Supplementary material for: Circulating Insulin-Like Growth Factor I is Involved in the Effect of High Fat Diet on Peripheral Amyloid β Clearance
Source: PubMed Central journal article supplement (PMC7766006; doi:10.3390/ijms21249675), 2020-12-18
Supplement: ijms-21-09675-s001.pdf [file ijms-21-09675-s001.pdf]

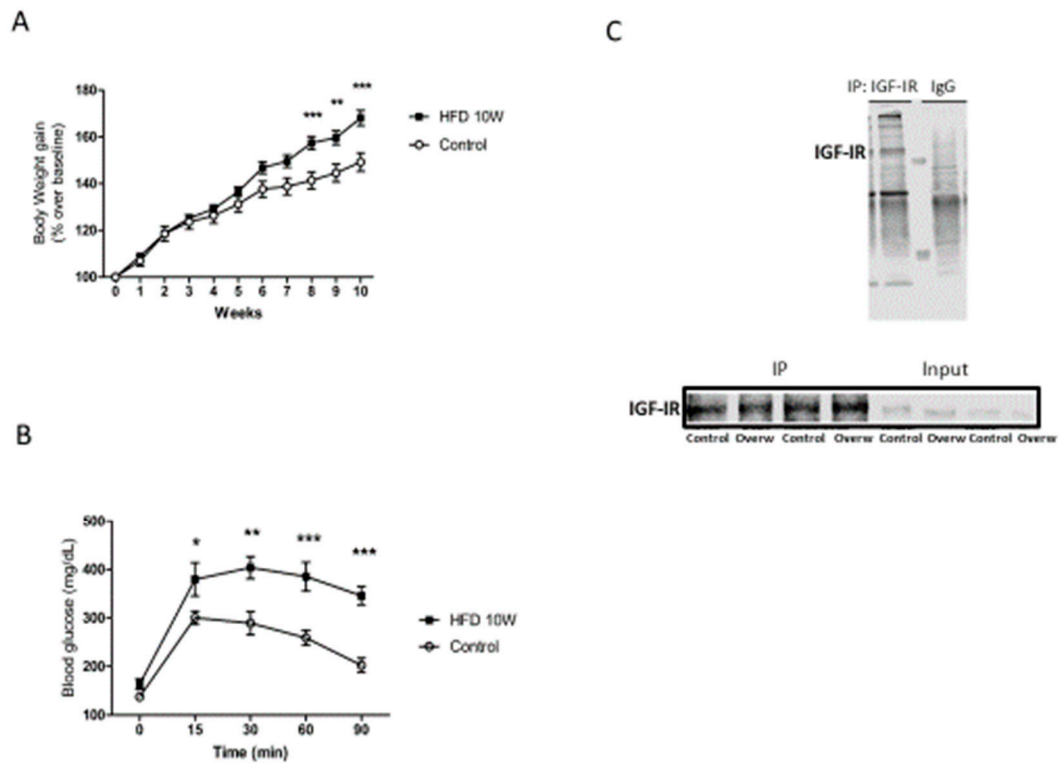

**Supplementary Figure S1.** **A.** Mice submitted to a high fat diet during 10 weeks (W) show increased body weight along time (n=10 per group). **B.** Overweight mice show reduced tolerance to systemic glucose load, as determined by significantly greater blood glucose levels over 90 min after glucose administration. **C.** Immunoprecipitation controls. Upper blot: lysate was immunoprecipitated with either anti-IGF-IR or non-immune IgG and blotted with anti-IGF-IR. A band corresponding to IGF-IR is seen only after immunoprecipitation with anti-IGF-IR. Lower blot: lysates from control and overweight (overw) brains were immunoprecipitated with anti-IGF-IR (IP) or directly assayed by IGF-IR western blot (input).
